# Supplementary material for: Staph wars: the antibiotic pipeline strikes back
Source: PubMed Central journal article supplement (PMC10569064; doi:10.1099/mic.0.001387), 2023-09-01
Supplement: mic-169-1387-s001.pdf [file mic-169-1387-s001.pdf]

## Supplementary information

**Table 1. Antibiotics under phase III and phase II clinical investigation for alternative indications that show anti-staphylococcal activity.** Antibiotics are described by company, drug class, route of administration, indication and trial number. CDAD, Clostridium difficile-associated diarrhoea; CDI, C. difficile infections; uUTI, uncomplicated urinary tract infections; IV, intra-venous; po, Per os (oral administration). \*denotes a first in class antibiotic, \*\*denotes a first in class antibiotic with a novel target.

| Antibiotic       | Company              | Drug class                                            | Route of administration | Indication                          | Trial number                                                                              |
|------------------|----------------------|-------------------------------------------------------|-------------------------|-------------------------------------|-------------------------------------------------------------------------------------------|
| <b>Phase III</b> |                      |                                                       |                         |                                     |                                                                                           |
| Gepotidacin      | GSK                  | Triazaacenaphthylene type II topoisomerase inhibitor* | IV, po                  | uUTI                                | <a href="#">NCT04010539</a><br><a href="#">NCT04020341</a><br><a href="#">NCT04187144</a> |
| Zolidoflacin     | Entasis Therapeutics | Spiropyrimidinetrione*                                | po                      | Uncomplicated gonococcal infections | <a href="#">NCT03959527</a>                                                               |
| <b>Phase II</b>  |                      |                                                       |                         |                                     |                                                                                           |
| MGB-BP-3         | MGB Biopharma        | Distamycin**                                          | po                      | CDAD                                | <a href="#">NCT03824795</a>                                                               |
| DNV3837          | DEINOVE              | Oxazolidinone-quinolone hybrid                        | IV                      | CDI                                 | <a href="#">NCT03988855</a>                                                               |
| CRS3123          | Crestone Inc.        | Diaryldiamine**                                       | po                      | CDI                                 | <a href="#">NCT04781387</a>                                                               |

**Table 2. Antibiotics in phase I clinical trials.** Antibiotics are described by company, drug class, route of administration, indication/s and trial number. Previous developmental names are indicated in brackets. ABSSSI, acute bacterial skin and skin structure infections; BSI, bloodstream infections; CABP, community acquired bacterial pneumonia; IV, intra-venous; po, Per os (oral administration); PJI, prosthetic joint infections. \*denotes a first in class antibiotic \*\*denotes a first in class antibiotic with a novel target.

| Antibiotic               | Company                   | Drug class               | Route of administration | Indication            | Trial number                                               |
|--------------------------|---------------------------|--------------------------|-------------------------|-----------------------|------------------------------------------------------------|
| PLG0206                  | Peptilogics               | Antimicrobial peptide    | IV                      | PJI                   | <a href="#">NCT05137314</a>                                |
| Wap-8294A2 (Lotilibcin)  | aRigen                    | Cyclic depsipeptide*     | IV, topical             | ABSSSI, acne vulgaris |                                                            |
| TXA709                   | TAXIS Pharmaceuticals     | FtsZ benzamide**         | po                      | MRSA infections       | <a href="#">NCT02596399</a>                                |
| DSTA46375                | Genentech                 | mAb rifamycin conjugate* | IV                      | BSI                   | <a href="#">NCT03162250</a>                                |
| Zifanocycline (KBP-7072) | KBP BioSciences           | Tetracycline             | po                      | CABP                  | <a href="#">NCT02454361</a><br><a href="#">NCT04532957</a> |
| TP-271                   | Tetraphase                | Tetracycline             | po                      | CABP                  | <a href="#">NCT03234738</a>                                |
| BCM-0184                 | biocidium pharmaceuticals | Undisclosed              | po, topical             | MRSA infections       |                                                            |
| RECCE327                 | Recce pharmaceuticals     | Undisclosed              | IV, topical             | MRSA burn wound, BSI  |                                                            |
